# Supplementary material
Source: PubMed Central journal article supplement (PMC8106874)
Supplement: NIHMS1685192-supplement-2.pdf [file NIHMS1685192-supplement-2.pdf]

## Supplemental Fig 1. Cartilage and transitional zone areas

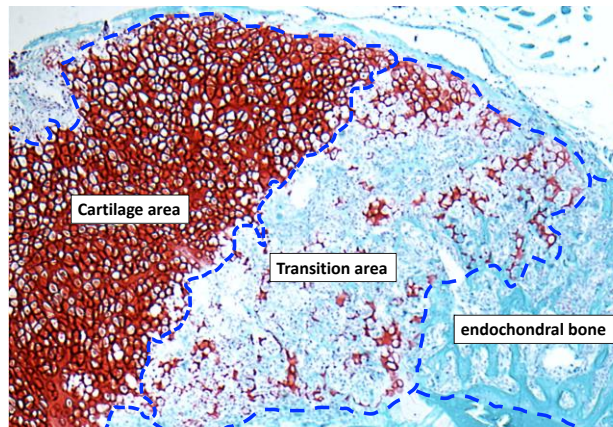

**Supplemental Fig 1. Cartilage, transitional zone (the chondro-osseous junction) and the bone areas.** A histologic image is shown of the fracture callus stained with Safranin-O/fast green, illustrating areas of cartilage, the transition zone containing a mix of cartilage and bone and the endochondral bone.

## Supplemental Fig 2. MMP 13 expression in chondrocytes

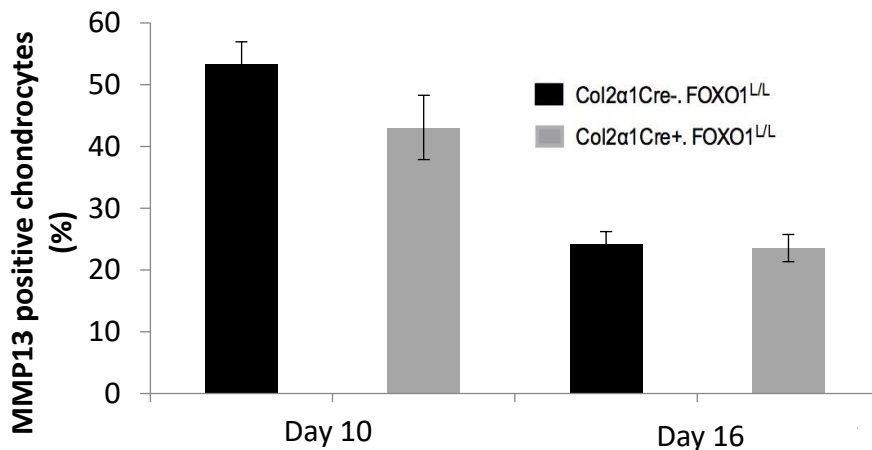

**Supplemental Fig 2. MMP13 expression in chondrocytes.** Fractures were obtained from experimental and matched control mice as indicated. Histologic sections were examined by immunofluorescence with antibody specific for MMP13 and compared to a reference section stained with Safranin-O/fast green to identify cartilage and expression in chondrocytes. No signal was detected in matched negative control antibody. The percentage of MMP13 immunopositive chondrocytes are expressed as mean  $\pm$  SEM;  $P > 0.05$  for Cre<sup>+</sup> vs. Cre<sup>-</sup> groups at each time point.

## Supplemental Fig 3. Micro-CT:

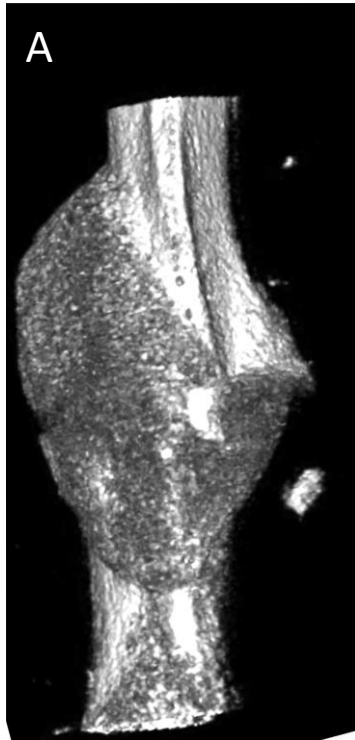

Micro-CT (Day 16)  
Col2 $\alpha$ 1Cre-FOXO1<sup>L/L</sup>

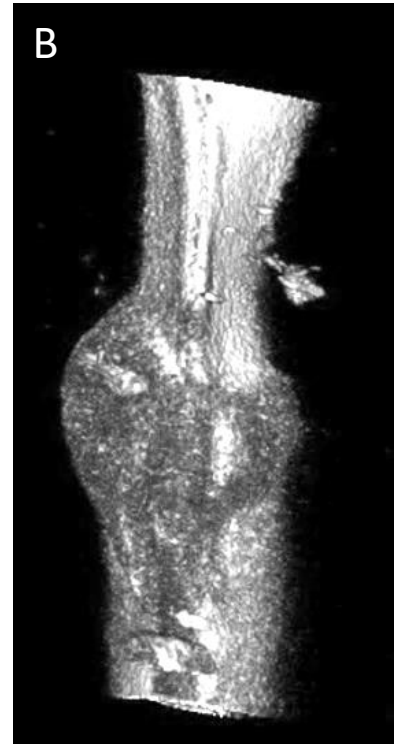

Micro-CT (Day 16)  
Col2 $\alpha$ 1Cre<sup>+</sup>FOXO1<sup>L/L</sup>

**Supplemental Fig 3.** Micro-CT was performed on fracture calluses during healing 16 days after fracture in (A) Col2 $\alpha$ 1Cre-FOXO1L/L control mice, and (B) mice with FOXO1 deletion. Col2 $\alpha$ 1Cre+FOXO1L/L The total callus volume (TV), amount of bone volume (BV), and the BV/TV were quantified. The results are summarized in supplemental table 3.
